# Supplementary material for: Fine Particulate Matter Exposure Alters Pulmonary Microbiota Composition and Aggravates Pneumococcus-Induced Lung Pathogenesis
Source: PubMed Central journal article supplement (PMC7649221; doi:10.3389/fcell.2020.570484), 2020-10-26

Fig. S1

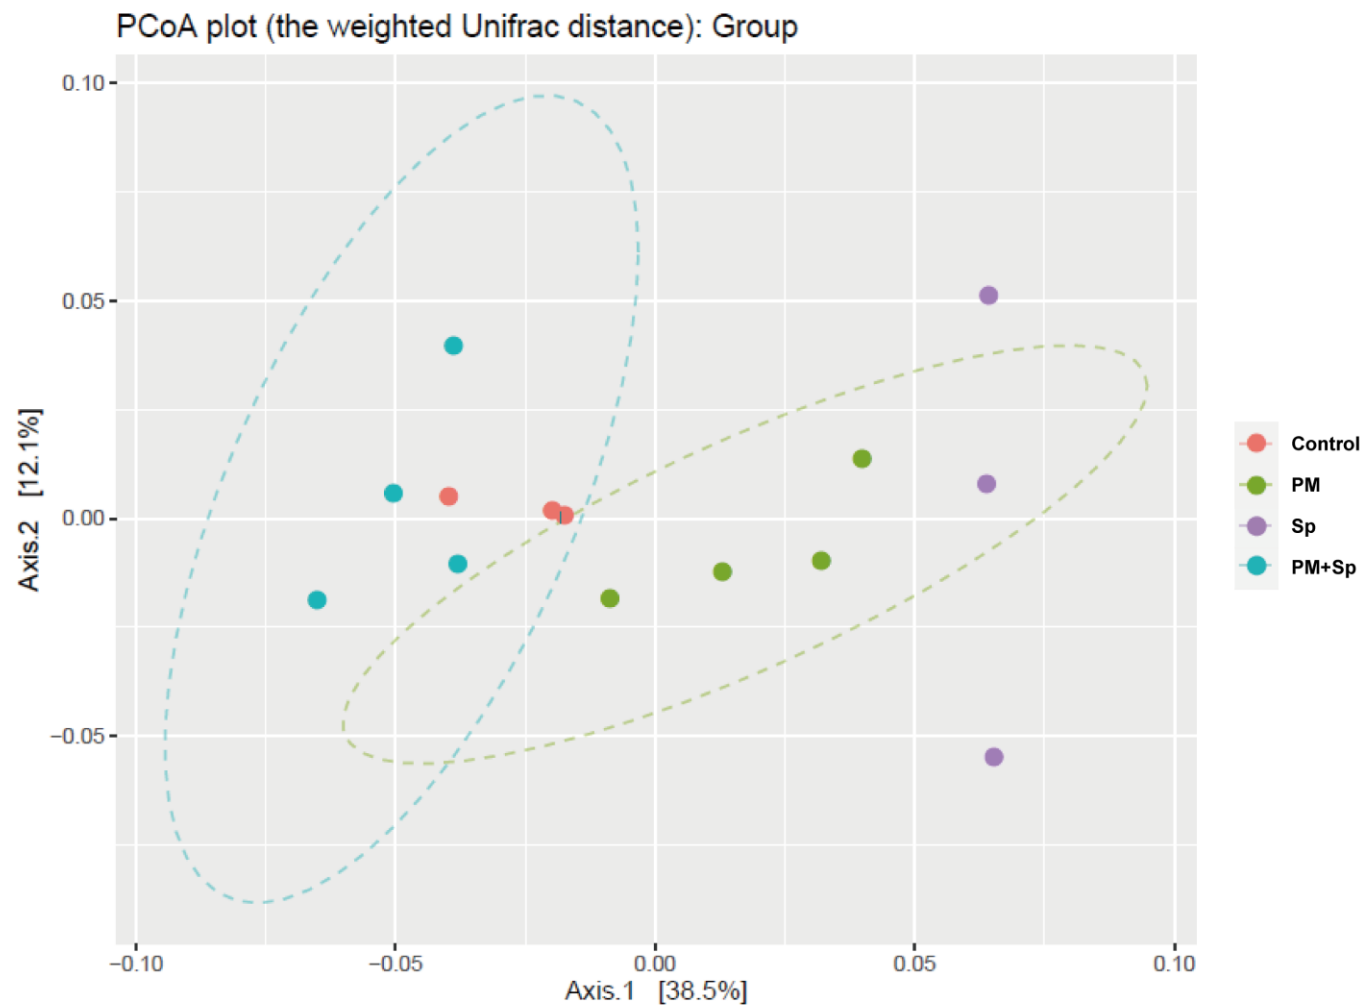

Fig. S2

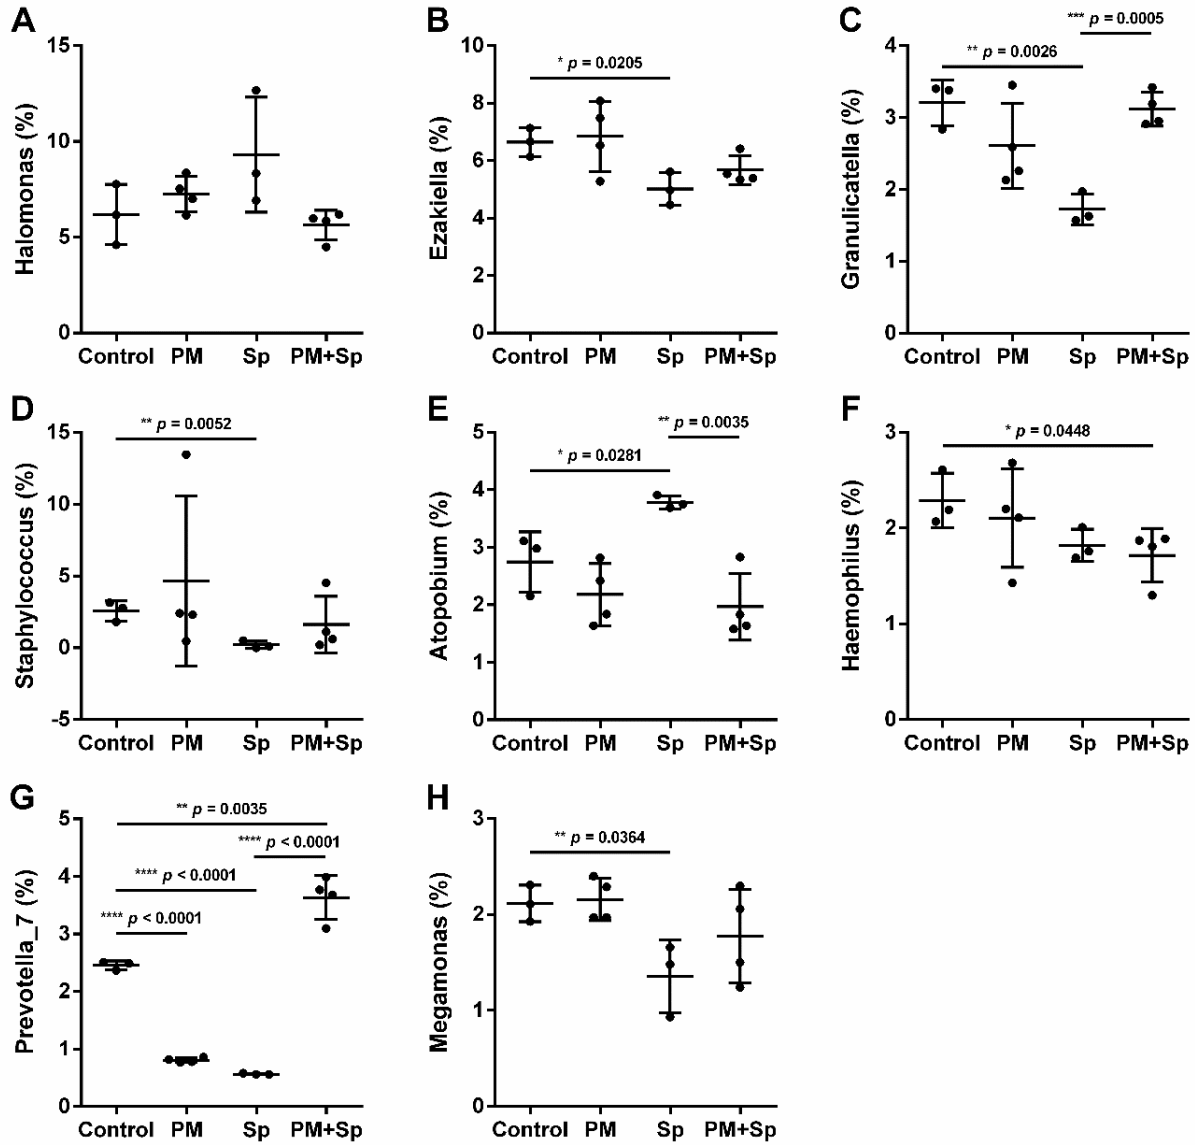

Fig. S3

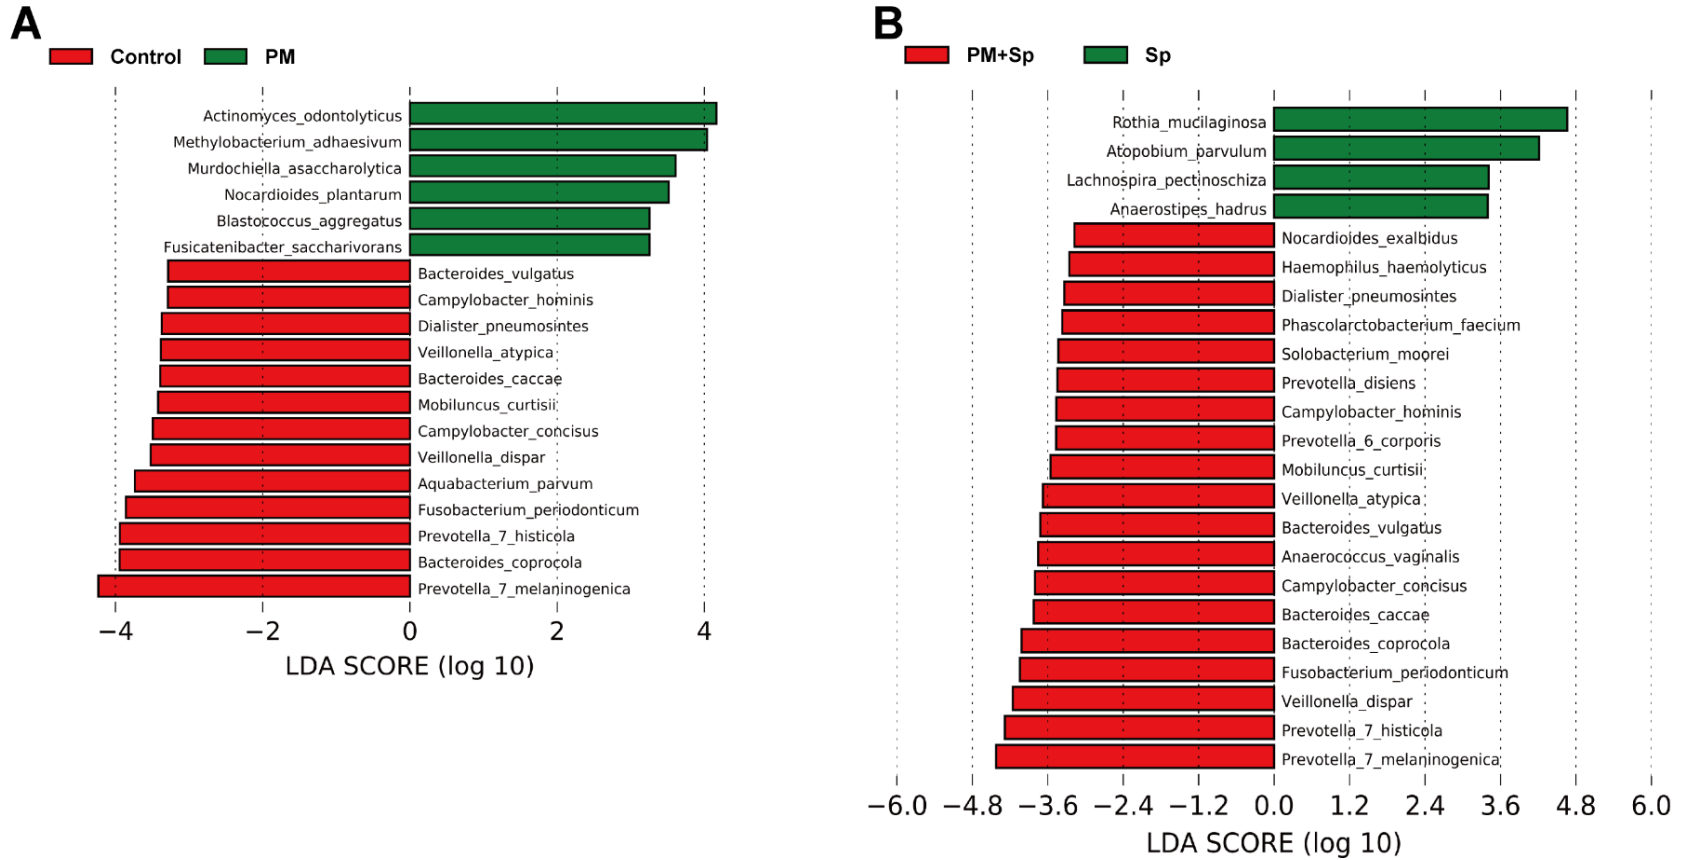

# Fig. S4

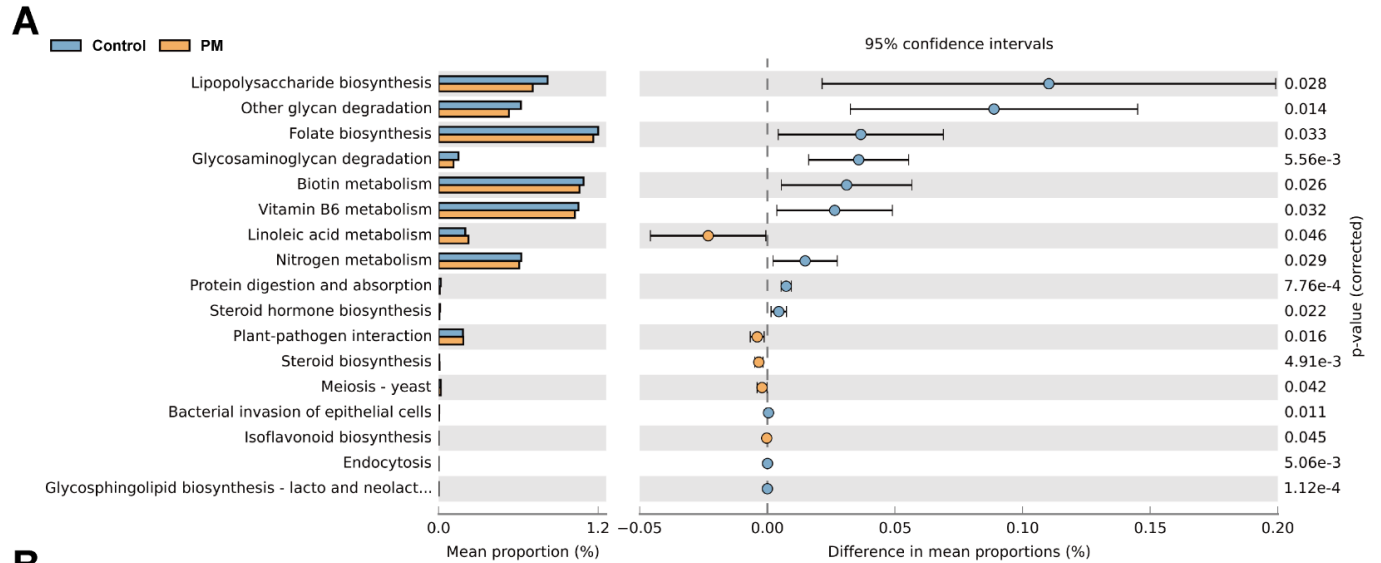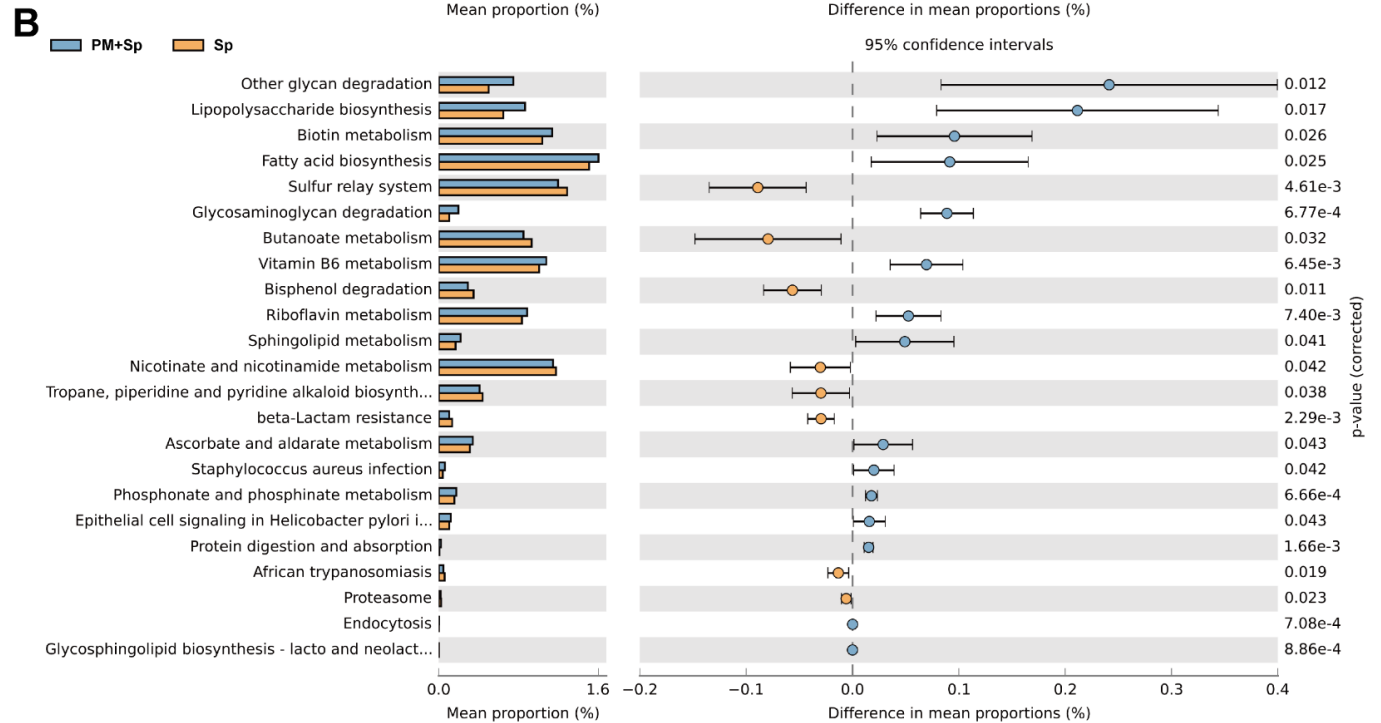

Fig. S5

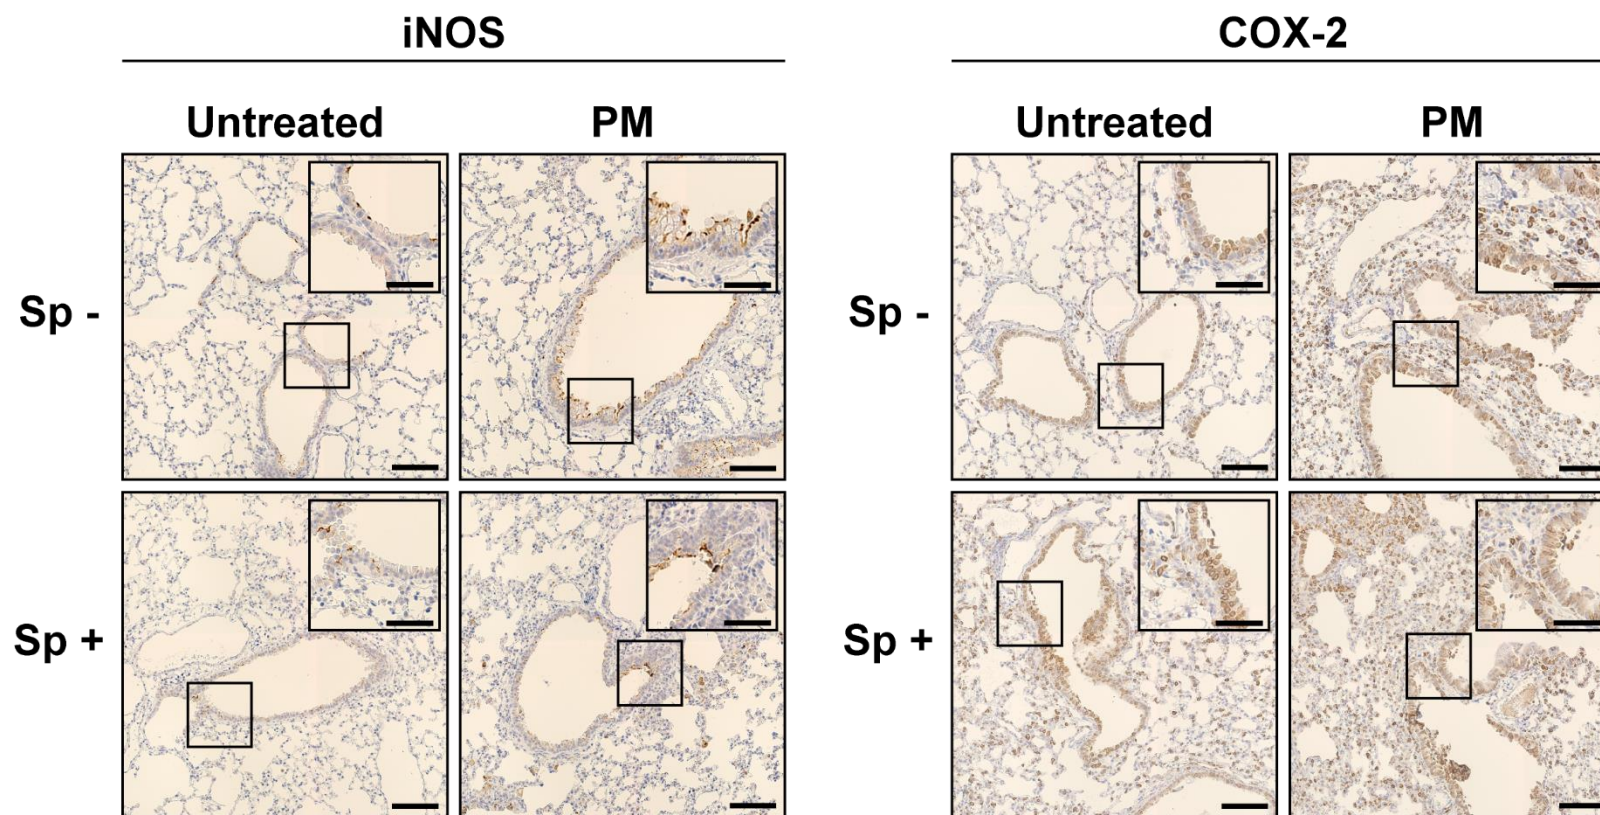

Fig. S6

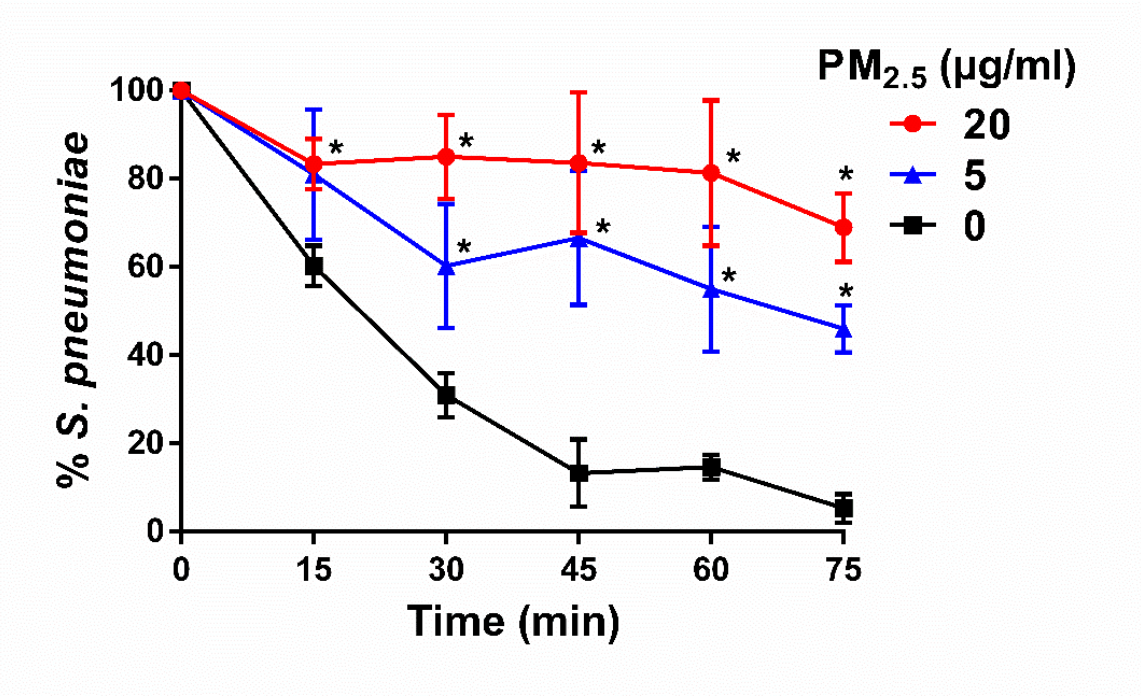

Supplement: Presentation_1.pdf [file Presentation_1.pdf]
